# Supplementary material for: Teachers’ Beliefs About Children’s Anger and Skill in Recognizing Children’s Anger Expressions
Source: PubMed Central journal article supplement (PMC7107660; doi:10.3389/fpsyg.2020.00474), 2020-03-24
Supplement: Image_1.pdf [file Image_1.pdf]

## Appendix A

### Teachers' Beliefs about Student Emotions – Anger

(TBASE – Anger)

*Directions: For this questionnaire, please indicate how much you agree with each statement or to what degree you believe each statement to be true.*

| 1               | 2           | 3              | 4          | 5               |
|-----------------|-------------|----------------|------------|-----------------|
| Not at all true | Rarely true | Sometimes true | Often true | Very often true |

#### Harmful

|                                                                                  |
|----------------------------------------------------------------------------------|
| When students get angry, they will have a hard time learning.                    |
| Children can think more clearly when anger does not get in the way.              |
| A student's anger can harm their peer relationships.                             |
| It is important in school for children to avoid feeling angry whenever possible. |
| Anger in children can be emotionally dangerous.                                  |
| A student's anger often leads to negative outcomes in the classroom.             |

#### Useful

|                                                                                          |
|------------------------------------------------------------------------------------------|
| It is useful for children to feel angry sometimes.                                       |
| A student's anger can be a relief to them, like a storm that clears the air.             |
| Anger can help students find a way to change a situation that needs changing.            |
| It is good for children to let their anger out.                                          |
| Expressing anger is a good way for a student to let their desires and opinions be known. |
| Being angry can motivate students to change or fix something in their lives.             |
| Anger can help me understand what the student is thinking.                               |

#### Manipulate

|                                                                                             |
|---------------------------------------------------------------------------------------------|
| Children use emotions to manipulate others.                                                 |
| Children often act sad or angry just to get their own way.                                  |
| When students are angry at a teacher, they are usually challenging the teacher's decisions. |

#### Distressing

|                                                                                  |
|----------------------------------------------------------------------------------|
| When a child gets angry in the classroom, I get frustrated with them.            |
| I am uncomfortable when a student shows anger in my classroom.                   |
| When children show anger, they usually make the situation worse                  |
| I try to view a child's anger as an opportunity instead of a problem. (REVERSAL) |
