# Supplementary material for: Teachers’ Beliefs About Children’s Anger and Skill in Recognizing Children’s Anger Expressions
Source: PubMed Central journal article supplement (PMC7107660; doi:10.3389/fpsyg.2020.00474), 2020-03-24
Supplement: Table_1.pdf [file Table_1.pdf]

Table S1. Teachers' beliefs about emotion predicting anger bias

| Outcome: Anger Bias |                 |            |                  |            |
|---------------------|-----------------|------------|------------------|------------|
|                     | Anger is Useful |            | Anger is Harmful |            |
|                     | OR              | CI         | OR               | CI         |
| Intercept           | 0.37            | 0.06, 2.17 | 0.16*            | 0.04, 0.72 |
| Teacher Belief      | 1.09            | 0.71, 1.68 | 1.39             | 0.96, 2.01 |
| Covariate           |                 |            |                  |            |
| Teacher Age         | 0.98            | 0.97, 1.00 | 0.99             | 0.97, 1.00 |
| Teacher Gender      | 0.85            | 0.53, 1.35 | 0.82             | 0.54, 1.23 |
| Round               | 0.53**          | 0.43, 0.64 | 0.53**           | 0.43, 0.64 |

Note:

1. Gender: "0" = Male, "1" = Female.

2. For odds ratios, values above 1 indicate probability of anger bias occurring, and values below 1 indicate probability of anger bias not occurring.

\* $p < .05$ , \*\* $p < .01$
